# Supplementary material for: Disturbed Blood Flow Acutely Increases Endothelial Microparticles and Decreases Flow Mediated Dilation in Patients With Heart Failure With Reduced Ejection Fraction
Source: Frontiers journal article supplement (doi:10.3389/fphys.2021.629674), 2021-03-11
Supplement: Table_1.DOCX [file Table_1.DOCX]

| **Variables** | **HFrEF** | | | **Control** | | | ***P* Values** |
| --- | --- | --- | --- | --- | --- | --- | --- |
| *N* | 18 | | | 14 | | |  |
| Age, y | 54.72 | ± | 1.72 | 49.00 | ± | 2.53 | 0.07 |
| Sex, M/F | 16/2 | | | 12/2 | | | 0.53 |
| BMI, Kg/m2 | 25.50 | ± | 0.94 | 30.85 | ± | 5.44 | 0.28 |
| VO2peak, ml/Kg/min | 15.90 | ± | 0.84 | 37.78 | ± | 5.08 | <0.0001 |
| Systolic BP, mmHg | 118.00 | ± | 12.00 | 124.00 | ± | 10.00 | 0.30 |
| Diastolic BP, mm Hg | 68.00 | ± | 11.00 | 64.00 | ± | 6.00 | 0.23 |
| Heart Rate, bpm | 69.00 | ± | 11.00 | 67.00 | ± | 8.00 | 0.65 |
| Total Cholesterol, mg/dl | 168.27 | ± | 9.50 | 196.40 | ± | 14.36 | 0.10 |
| HDL Cholesterol, mg/dl | 47.05 | ± | 2.90 | 50.73 | ± | 3.77 | 0.44 |
| LDL Cholesterol, mg/dl | 93.27 | ± | 8.89 | 129.10 | ± | 11.78 | 0.02 |
| Glucose, mg/dl | 124.30 | ± | 11.23 | 93.72 | ± | 2.14 | 0.04 |
| Triglycerides, mg/dl | 131.61 | ± | 13.30 | 102.40 | ± | 13.35 | 0.15 |
| Serium Creatinine, mg/dl | 1.20 | ± | 0.05 | 1.06 | ± | 0.03 | 0.04 |
| eGFR (ml/min/1.73m2) | 57.81 | ± | 0.89 | 59.55 | ± | 0.22 | 0.14 |
| NYHA FC (I/II) | 7/11 | | | -- | | |  |
| LVEF, % | 26.05 | ± | 1.36 | 65.00 | ± | 0.98 | <0.0001 |
| LVDD, mm | 69.72 | ± | 1.79 | 47.21 | ± | 0.63 | <0.0001 |
| LVSD, mm | 62.61 | ± | 2.06 | 30.57 | ± | 0.65 | <0.0001 |
| **HF etiology, n** |  | | | | | |  |
| Idiopathic | 2 | | | -- | | |  |
| Ischemic | 7 | | | -- | | |  |
| Hypertensive | 3 | | | -- | | |  |
| Chagasic | 4 | | | -- | | |  |
| Alcoholic | 2 | | | -- | | |  |
| **Medications, n** |  | | | | | | |
| β-blocker | 18 | | | -- | | |  |
| ACEI/ARB | 17 | | | -- | | |  |
| Spironolactone | 16 | | | -- | | |  |
| Diuretics | 16 | | | -- | | |  |

**Table 1.** Baseline characteristics of patients with heart failure with reduced ejection fraction and control individuals.

Data presented as mean ± SEM. HFrEF = Heart failure with reduced ejection fraction; BMI= Body mass index; Systolic BP= systolic blood pressure; Diastolic BP= Diastolic blood pressure; HR= Heart rate; HDL cholesterol = Ligh-density lipoprotein cholesterol; LDL cholesterol = Low-density lipoprotein cholesterol; NYHA = New York Heart Association Functional Class; LVEF%= Left ventricular ejection fraction; LVDD = Left ventricular diastolic diameter; and LVDD = Left ventricular sistolic diameter, and eGRF= estimated glomerular filtration.
